# Supplementary material for: The importance of slow canopy wilting in drought tolerance in soybean
Source: PubMed Central journal article supplement — J Exp Bot. 2019 Apr 13;71(2):642–52. doi: 10.1093/jxb/erz150 (PMC6946001; doi:10.1093/jxb/erz150), 2019-04-13
Supplement: erz150_suppl_supplementary-figure_s1_tables-s1-s3.pdf [file erz150_suppl_supplementary-figure_s1_tables-s1-s3.pdf]

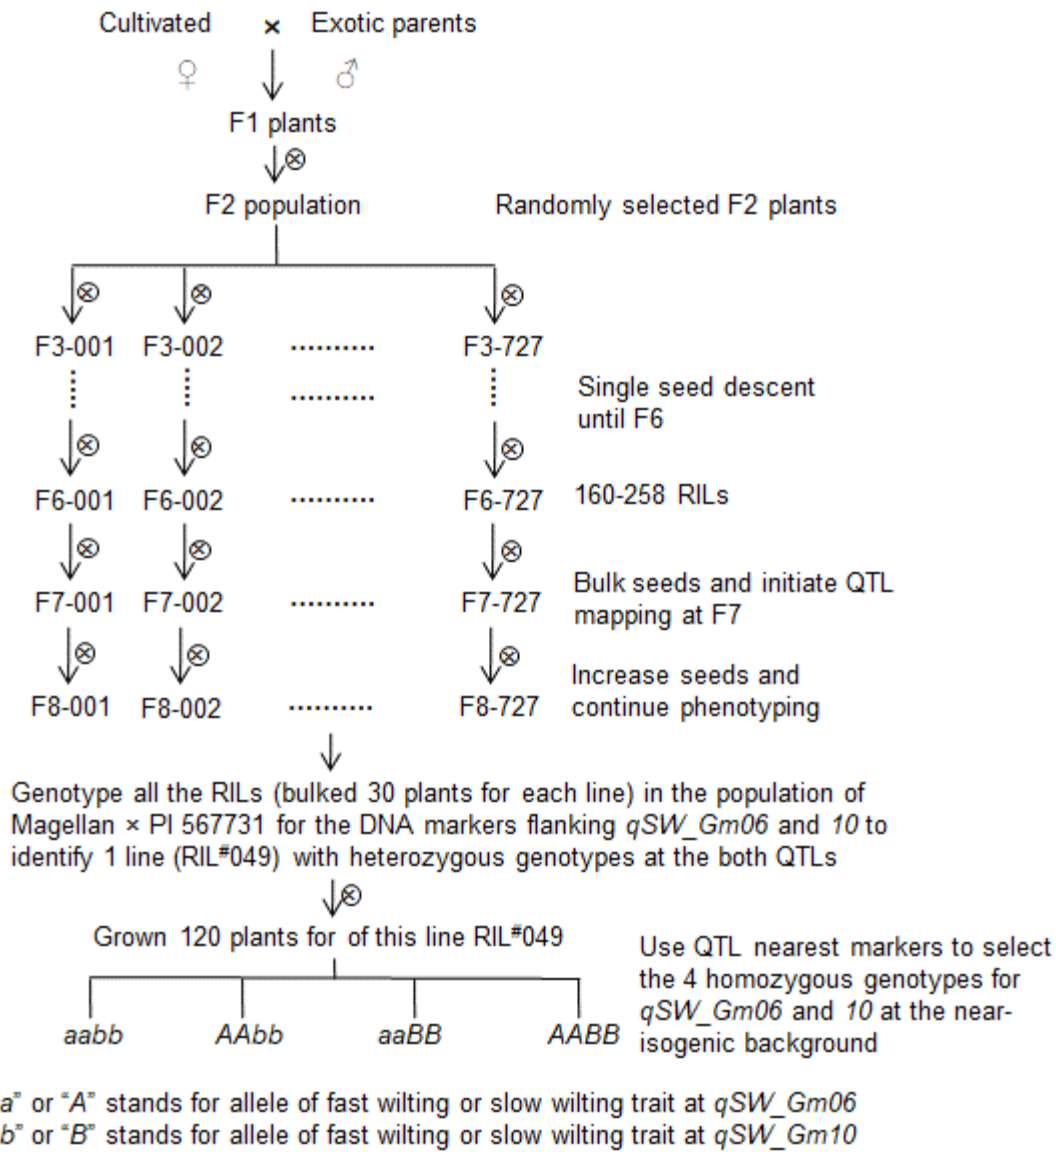

**Supplementary Figure 1.** A scheme to develop recombinant-inbred line (RIL) mapping populations and near-isogenic lines (NILs) for *qSW\_Gm06* and *qSW\_Gm10*.

**Supplementary Table 1.** Recombinant-inbred lines selected for yield test.

| Entry | Line   | Population           | Wilting score | Plant height (cm) | Lodging score | Maturity (day) |
|-------|--------|----------------------|---------------|-------------------|---------------|----------------|
| 1     | RIL005 | Pana × PI 567690     | 3.0           | 94.6              | 2.0           | 104            |
| 2     | RIL026 | Pana × PI 567690     | 4.0           | 72.4              | 1.0           | 108            |
| 3     | RIL047 | Pana × PI 567690     | 3.0           | 91.4              | 1.0           | 105            |
| 4     | RIL091 | Pana × PI 567690     | 3.5           | 78.1              | 2.5           | 107            |
| 5     | RIL136 | Pana × PI 567690     | 3.0           | 91.8              | 1.0           | 104            |
| 6     | RIL148 | Pana × PI 567690     | 3.5           | 85.7              | 1.0           | 103            |
| 7     | RIL168 | Pana × PI 567690     | 3.0           | 109.2             | 2.0           | 108            |
| 8     | RIL201 | Pana × PI 567690     | 3.0           | 106.7             | 2.0           | 105            |
| 9     | RIL211 | Pana × PI 567690     | 3.5           | 95.3              | 1.0           | 107            |
| 10    | RIL223 | Pana × PI 567690     | 3.5           | 67.3              | 1.0           | 103            |
| 11    | RIL227 | Pana × PI 567690     | 3.5           | 54.6              | 2.0           | 106            |
| 12    | RIL290 | Pana × PI 567690     | 3.0           | 96.5              | 1.8           | 108            |
| 13    | RIL311 | Pana × PI 567690     | 3.0           | 78.7              | 1.0           | 103            |
| 14    | RIL374 | Pana × PI 567690     | 2.5           | 92.1              | 1.5           | 108            |
| 15    | RIL246 | Pana × PI 567690     | 1.0           | 82.6              | 2.5           | 108            |
| 16    | RIL009 | Pana × PI 567690     | 1.0           | 88.9              | 1.0           | 115            |
| 17    | RIL027 | Pana × PI 567690     | 1.0           | 76.2              | 1.5           | 108            |
| 18    | RIL055 | Pana × PI 567690     | 1.0           | 82.6              | 1.0           | 113            |
| 19    | RIL123 | Pana × PI 567690     | 1.5           | 90.2              | 2.0           | 109            |
| 20    | RIL142 | Pana × PI 567690     | 1.0           | 68.6              | 1.0           | 102            |
| 21    | RIL214 | Pana × PI 567690     | 1.0           | 87.0              | 1.8           | 114            |
| 22    | RIL224 | Pana × PI 567690     | 1.0           | 67.3              | 1.0           | 105            |
| 23    | RIL277 | Pana × PI 567690     | 1.0           | 88.9              | 1.5           | 108            |
| 24    | RIL317 | Pana × PI 567690     | 1.0           | 61.0              | 2.0           | 107            |
| 25    | RIL364 | Pana × PI 567690     | 1.0           | 85.1              | 1.0           | 107            |
| 26    | RIL372 | Pana × PI 567690     | 1.3           | 79.4              | 1.5           | 106            |
| 27    | RIL200 | Pana × PI 567690     | 1.8           | 95.9              | 2.0           | 107            |
| 28    | RIL328 | Pana × PI 567690     | 1.0           | 106.7             | 1.0           | 114            |
| 29    | RIL017 | Magellan × PI 567731 | 1.5           | 48.3              | 1.5           | 104            |
| 30    | RIL039 | Magellan × PI 567731 | 1.5           | 76.8              | 1.0           | 105            |
| 31    | RIL145 | Magellan × PI 567731 | 1.0           | 81.3              | 1.5           | 107            |
| 32    | RIL040 | Magellan × PI 567731 | 1.0           | 83.8              | 2.3           | 109            |
| 33    | RIL097 | Magellan × PI 567731 | 1.5           | 88.3              | 1.0           | 105            |
| 34    | RIL122 | Magellan × PI 567731 | 1.5           | 78.7              | 2.0           | 105            |
| 35    | RIL099 | Magellan × PI 567731 | 1.0           | 48.3              | 1.0           | 102            |
| 36    | RIL080 | Magellan × PI 567731 | 1.5           | 63.5              | 2.0           | 113            |
| 37    | RIL042 | Magellan × PI 567731 | 1.0           | 78.7              | 2.0           | 108            |
| 38    | RIL124 | Magellan × PI 567731 | 3.0           | 67.3              | 2.5           | 113            |
| 39    | RIL116 | Magellan × PI 567731 | 3.8           | 83.8              | 1.0           | 105            |
| 40    | RIL147 | Magellan × PI 567731 | 3.6           | 109.2             | 3.0           | 115            |
| 41    | RIL050 | Magellan × PI 567731 | 3.0           | 50.8              | 1.0           | 112            |
| 42    | RIL078 | Magellan × PI 567731 | 3.0           | 116.8             | 2.5           | 115            |
| 43    | RIL035 | Magellan × PI 567731 | 4.0           | 47.0              | 1.0           | 117            |
| 44    | RIL112 | Magellan × PI 567731 | 3.8           | 86.4              | 2.0           | 119            |
| 45    | RIL151 | Magellan × PI 567731 | 3.0           | 94.0              | 2.0           | 118            |
| 46    | RIL114 | Magellan × PI 567731 | 3.0           | 86.4              | 1.0           | 118            |

**Supplementary Table 2.** Yield of the selected contrasting recombinant-inbred lines from Pana × PI 567690 population at irrigated and rain-fed conditions.

| Population           | Pana × PI 567690  |          |              |          |                   |          |              |          |
|----------------------|-------------------|----------|--------------|----------|-------------------|----------|--------------|----------|
| Location             | Salina            |          |              |          | Delta center      |          |              |          |
| Wilting type         | Fast wilting type |          | Slow wilting |          | Fast wilting type |          | Slow wilting |          |
| Conditions           | Irrigation        | Rain-fed | Irrigation   | Rain-fed | Irrigation        | Rain-fed | Irrigation   | Rain-fed |
| Mean of yield (t/ha) | 2.52              | 1.31     | 2.33         | 1.52     | 2.35              | 1.58     | 2.25         | 1.64     |
| Std of yield (t/ha)  | 0.16              | 0.15     | 0.13         | 0.11     | 0.12              | 0.16     | 0.27         | 0.18     |

**Supplementary Table 3.** Yield of the selected contrasting recombinant-inbred lines from Magellan × PI 567731 population at irrigated and rain-fed conditions.

| Population           | Magellan × PI 567731 |          |              |          |                   |          |              |          |
|----------------------|----------------------|----------|--------------|----------|-------------------|----------|--------------|----------|
| Location             | Salina               |          |              |          | Delta center      |          |              |          |
| Wilting type         | Fast wilting type    |          | Slow wilting |          | Fast wilting type |          | Slow wilting |          |
| Conditions           | Irrigation           | Rain-fed | Irrigation   | Rain-fed | Irrigation        | Rain-fed | Irrigation   | Rain-fed |
| Mean of yield (t/ha) | 2.71                 | 1.51     | 2.48         | 1.69     | 2.27              | 1.37     | 2.08         | 1.79     |
| Std of yield (t/ha)  | 0.23                 | 0.12     | 0.18         | 0.14     | 0.19              | 0.22     | 0.18         | 0.13     |
